# Supplementary material
Source: Springer Nature journal article supplement (https://www.springermedizin.de/resource/supplementary/12889_2011_3818_MOESM2_ESM.pdf/9489964)

Pregnancy

Postpartum

Delivery Enrollment

Timeline:

Telephone contacts (P):

P1  
pregnancy  
screening  
33wk

P2  
postpartum  
screening  
2-4wk

P3  
postpartum  
follow-up  
6mo

Mailing contacts:

Invitation Letter  
& Card  
≥ 31 wk of gestation

Monthly Questionnaires  
3mo postpartum — 11mo postpartum

In-person visits:

Visit 1  
6-10 wk postpartum

Visit 2  
1yr postpartum

Visit 3  
2 yr postpartum

**Legend**

- ..... Telephone contacts (P)
- Mailing contacts
- ..—... In-person visits

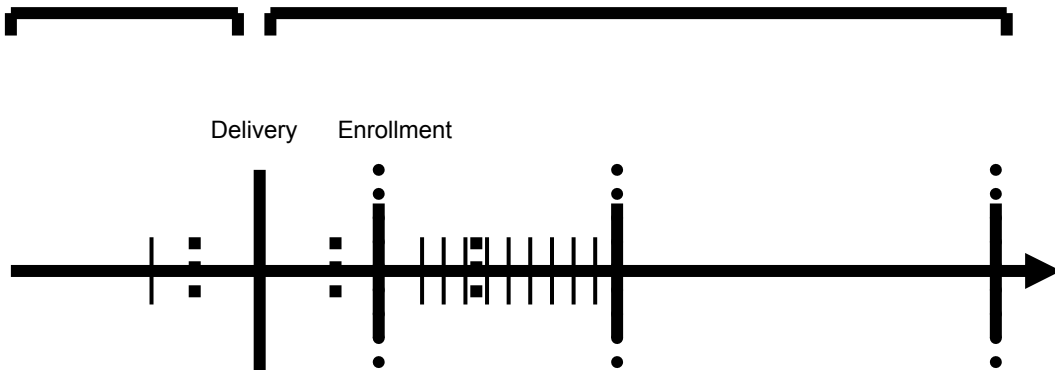

Supplement: MOESM2 [file 9489964]
